# Supplementary material
Source: PubMed Central journal article supplement (PMC4461004)
Supplement: NIHMS448905-supplement-S1.pdf [file NIHMS448905-supplement-S1.pdf]

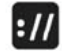

**SUPPORTING INFORMATION FOR:**

Zumsteg, J.M., J.S. Cooper, and M.S. Noon. 2012. Systematic Review Checklist: A Standardized Technique for Assessing and Reporting Reviews of Life Cycle Assessment Data. *Journal of Industrial Ecology*.

**Summary**

This supporting information provides a sample STARR-LCA worksheet for use in study planning, manuscript preparation, and peer review.

**STARR-LCA Worksheet for Researchers and Reviewers**

| Item                                                 | Description                                                                                                                                                                                                                                                                                                                                                                                                                                               | Included? <sup>1</sup> | Comments |
|------------------------------------------------------|-----------------------------------------------------------------------------------------------------------------------------------------------------------------------------------------------------------------------------------------------------------------------------------------------------------------------------------------------------------------------------------------------------------------------------------------------------------|------------------------|----------|
| 1. Document title, structured summary, and key words | <ul style="list-style-type: none"> <li>• Title identifies article as systematic review, meta-analysis or both</li> <li>• Abstract contains background; objectives; data sources; study eligibility criteria; scope, system boundaries and functional unit; study appraisal and synthesis methods; results; limitations; and conclusions with implications for key findings</li> <li>• Key words include meta-analysis and/or systematic review</li> </ul> | Y / N / I              |          |
| 2. Rationale of the review                           | <ul style="list-style-type: none"> <li>• Purpose of review study in the context of current knowledge</li> </ul>                                                                                                                                                                                                                                                                                                                                           | Y / N / I              |          |
| 3. Review questions and objectives                   | <ul style="list-style-type: none"> <li>• Question elements consistent with PIFT format<sup>2</sup></li> </ul>                                                                                                                                                                                                                                                                                                                                             | Y / N / I              |          |

|                                                              |                                                                                                                                                                                                                                                                                                                             |           |  |
|--------------------------------------------------------------|-----------------------------------------------------------------------------------------------------------------------------------------------------------------------------------------------------------------------------------------------------------------------------------------------------------------------------|-----------|--|
| 4. Description of review protocol                            | <ul style="list-style-type: none"> <li>• How possible studies or data for review were located</li> <li>• Information sources</li> <li>• Description of electronic search strategies</li> <li>• Process for selecting studies or data to include in the review summary</li> <li>• Description of further analyses</li> </ul> | Y / N / I |  |
| 5. Findings and features of individual studies in the review | <ul style="list-style-type: none"> <li>• Include major findings, methods and limitations</li> <li>• Present data graphically if possible</li> </ul>                                                                                                                                                                         | Y / N / I |  |
| 6. Assessment of bias                                        | <ul style="list-style-type: none"> <li>• Assessment of bias for individual studies included and across studies when summarized</li> <li>• Statement of funding source for the review</li> </ul>                                                                                                                             | Y / N / I |  |
| 7. Synthesis methods                                         | <ul style="list-style-type: none"> <li>• Description of how data was summarized qualitatively and quantitatively</li> </ul>                                                                                                                                                                                                 | Y / N / I |  |
| 8. Limitations of the Review                                 | <ul style="list-style-type: none"> <li>• Limitations of methodology</li> <li>• Guidance about appropriate generalization or application of review findings</li> </ul>                                                                                                                                                       | Y / N / I |  |
| 9. Summary of findings and conclusions                       | <ul style="list-style-type: none"> <li>• Clear conclusions</li> <li>• Discussion of conclusions in the context of other evidence</li> </ul>                                                                                                                                                                                 | Y / N / I |  |

*Note:* Topics may be addressed in multiple sections of a manuscript

1. Abbreviations for item inclusion: Y = yes; N = no; I = incomplete

2. PIFT = Population or process; Impacts of interest; Flows or economic sectors included; Type(s) of life cycle assessment
